# Supplementary material for: Theoretical calculation of spectroscopy properties of selenium bromide cation
Source: Royal Society of Chemistry journal article supplement (doi:10.1039/d2ra06580k), 2022-01-01
Supplement: d2ra06580k1.pdf [file d2ra06580k1.pdf]

## Support Information

### “Theoretical calculation of spectroscopy properties of selenium bromide cation”

Ming-jie wan<sup>a,b\*</sup>, Guo-sen Wang<sup>c</sup>, Xing-yong Huang<sup>a,b</sup>, Duo-Hui Huang<sup>a,b\*\*</sup>, Kang-lin Wei<sup>d</sup>

<sup>a</sup>Faculty of Science, Yibin University, Yibin, 644007, China

<sup>b</sup>Computational Physics Key Laboratory of Sichuan Province, Yibin University, Yibin, China

<sup>c</sup>School of Mathematics and Physics, Chengdu University of Technology, Chengdu, China

<sup>d</sup>Intelligent Manufacturing Institute of Yibin University, Yibin, China

#### Spectroscopic constants of $\Lambda$ -S states of SeBr<sup>+</sup>

Tables S1 and S2 show the calculated spectrum data for all the low excited states and the electronic grouping at the equilibrium bond lengths.

**S1:** Spectroscopy constants of the  $\Lambda - S$  states of SeBr<sup>+</sup>

| $\Lambda - S$ states | $T_e/\text{cm}^{-1}$ | $R_e/\text{\AA}$ | $\omega_e/\text{cm}^{-1}$ | $B_e/\text{cm}^{-1}$ | $\omega_e X_e/\text{cm}^{-1}$ |
|----------------------|----------------------|------------------|---------------------------|----------------------|-------------------------------|
| $X^3\Sigma^-$        | 0                    | 2.1802           | 378.5                     | 0.0905               | 1.0977                        |
| $1^1\Delta$          | 5733                 | 2.1776           | 381.7                     | 0.0907               | 1.0549                        |
| $1^1\Sigma^+$        | 10343                | 2.1890           | 366.1                     | 0.0897               | 1.2493                        |
| $1^5\Pi$             | 19759                | 2.9854           | 130.5                     | 0.0482               | 1.1235                        |
| $1^1\Sigma^-$        | 20145                | 2.4452           | 257.8                     | 0.0719               | 0.8183                        |
| $1^3\Pi$             | 20402                | 2.9313           | 104.4                     | 0.0500               | 0.8814                        |
| $1^3\Delta$          | 21263                | 2.4542           | 254.7                     | 0.0714               | 0.8267                        |
| $1^3\Sigma^+$        | 21711                | 2.4633           | 251.3                     | 0.0709               | 0.8224                        |
| $2^3\Sigma^-$        | 23885                | 2.5779           | 214.9                     | 0.0647               | 0.5816                        |
| $1^1\Pi$             | 27575                | 2.6979           | 164.1                     | 0.0591               | 0.1989                        |
| $2^1\Delta$          | 28564                | 2.6118           | 209.3                     | 0.0630               | 0.7779                        |
| $2^3\Pi$             | 30579                | 2.8478           | 134.9                     | 0.0530               | 0.6281                        |
| $3^3\Pi$             | 31027                | 2.8597           | 200.2                     | 0.0526               | 2.2213                        |

\* Corresponding authors. Email addresses: wanmingjie1983@sina.com

\*\* Corresponding authors. Email addresses: hdhzy912@163.com

|           |       |        |       |        |        |
|-----------|-------|--------|-------|--------|--------|
| $1^3\Phi$ | 32385 | 2.6194 | 248.8 | 0.0620 | 4.3734 |
| $4^3\Pi$  | 33534 | 2.9264 | 154.8 | 0.0502 | 1.2145 |
| $2^1\Pi$  | 33712 | 2.8983 | 137.5 | 0.0512 | 1.5400 |
| $1^1\Phi$ | 34942 | 2.8506 | 67.1  | 0.0532 | 0.9840 |
| $3^1\Pi$  | 37045 | 3.1107 | 98.9  | 0.0444 | 0.9914 |

**S2:** Main CSFs around the  $R_e$  of  $\text{SeBr}^+$

| $\Lambda - S$ states | Main CSFs at $R_e$ (%)                                                                                                           | $\Lambda - S$ states | Main CSFs at $R_e$ (%)                                                                                                          |
|----------------------|----------------------------------------------------------------------------------------------------------------------------------|----------------------|---------------------------------------------------------------------------------------------------------------------------------|
| $X^3\Sigma^-$        | $11\sigma^2 12\sigma^0 4\pi^4 5\pi^4 6\pi^2 2\delta^2$ (83.35)                                                                   | $2^1\Delta$          | $11\sigma^2 12\sigma^0 4\pi^4 5\pi^3 6\pi^3 2\delta^2$ (70.75)<br>$11\sigma^1 12\sigma^1 4\pi^4 5\pi^4 6\pi^2 2\delta^2$ (8.96) |
| $1^1\Delta$          | $11\sigma^2 12\sigma^0 4\pi^4 5\pi^4 6\pi^2 2\delta^2$ (79.55)                                                                   | $2^3\Pi$             | $11\sigma^1 12\sigma^0 4\pi^4 5\pi^4 6\pi^3 2\delta^2$ (86.0)                                                                   |
| $1^1\Sigma^+$        | $11\sigma^2 12\sigma^0 4\pi^4 5\pi^4 6\pi^2 2\delta^2$ (74.12)                                                                   | $3^3\Pi$             | $11\sigma^2 12\sigma^1 4\pi^4 5\pi^3 6\pi^2 2\delta^2$ (81.29)                                                                  |
|                      | $11\sigma^2 12\sigma^0 4\pi^4 5\pi^3 6\pi^3 2\delta^2$ (9.0)                                                                     |                      |                                                                                                                                 |
| $1^3\Pi$             | $11\sigma^2 12\sigma^1 4\pi^4 5\pi^4 6\pi^1 2\delta^2$ (66.73)<br>$11\sigma^2 12\sigma^1 4\pi^4 5\pi^3 6\pi^2 2\delta^2$ (15.59) | $4^3\Pi$             | $11\sigma^2 12\sigma^1 4\pi^4 5\pi^3 6\pi^2 2\delta^2$ (84.70)                                                                  |
| $1^5\Pi$             | $11\sigma^2 12\sigma^1 4\pi^4 5\pi^3 6\pi^2 2\delta^2$ (88.88)                                                                   | $2^1\Pi$             | $11\sigma^1 12\sigma^0 4\pi^4 5\pi^4 6\pi^3 2\delta^2$ (85.13)                                                                  |
| $1^1\Sigma^-$        | $11\sigma^2 12\sigma^0 4\pi^4 5\pi^3 6\pi^3 2\delta^2$ (87.27)                                                                   | $3^1\Pi$             | $11\sigma^2 12\sigma^1 4\pi^4 5\pi^3 6\pi^2 2\delta^2$ (87.66)                                                                  |
| $1^3\Delta$          | $11\sigma^2 12\sigma^0 4\pi^4 5\pi^3 6\pi^3 2\delta^2$ (87.54)                                                                   | $1^3\Phi$            | $11\sigma^2 12\sigma^1 4\pi^4 5\pi^3 6\pi^2 2\delta^2$ (86.96)                                                                  |
| $1^3\Sigma^+$        | $11\sigma^2 12\sigma^0 4\pi^4 5\pi^3 6\pi^3 2\delta^2$ (87.49)                                                                   | $1^1\Phi$            | $11\sigma^2 12\sigma^1 4\pi^4 5\pi^3 6\pi^2 2\delta^2$ (82.83)                                                                  |
| $2^3\Sigma^-$        | $11\sigma^2 12\sigma^0 4\pi^4 5\pi^3 6\pi^3 2\delta^2$ (75.22)                                                                   | $2^3\Delta$          | $11\sigma^1 12\sigma^1 4\pi^4 5\pi^4 6\pi^2 2\delta^2$ (84.34)                                                                  |
|                      | $11\sigma^2 12\sigma^1 4\pi^4 5\pi^4 6\pi^1 2\delta^2$ (67.61)                                                                   |                      |                                                                                                                                 |
| $1^1\Pi$             | $11\sigma^2 12\sigma^1 4\pi^4 5\pi^3 6\pi^2 2\delta^2$ (12.85)                                                                   | $1^5\Sigma^-$        | $11\sigma^1 12\sigma^1 4\pi^4 5\pi^4 6\pi^2 2\delta^2$ (87.89)                                                                  |

**Spectroscopy constants of  $\Omega$  states of  $\text{SeBr}^+$**

Table S3 shows all calculated SO matrix elements.

**S3:** Notation of spin-orbit matrix element

$$\begin{aligned}
 \text{SO}_1 &= -i \langle 1^1\Pi | \hat{H}_{SO}^{BP} | 1^3\Sigma_x^+ \rangle & \text{SO}_2 &= \langle 1^1\Pi | \hat{H}_{SO}^{BP} | 1^3\Sigma_y^+ \rangle & \text{SO}_3 &= -i \langle 2^1\Pi | \hat{H}_{SO}^{BP} | 1^3\Sigma_x^+ \rangle \\
 \text{SO}_4 &= \langle 2^1\Pi | \hat{H}_{SO}^{BP} | 1^3\Sigma_y^+ \rangle & \text{SO}_5 &= -i \langle X^3\Sigma^- | \hat{H}_{SO}^{BP} | 1^1\Pi_x \rangle & \text{SO}_6 &= \langle X^3\Sigma^- | \hat{H}_{SO}^{BP} | 1^1\Pi_y \rangle
 \end{aligned}$$

$$\begin{array}{lll}
\text{SO}_7 = -i \langle X^3 \Sigma^- | \hat{H}_{SO}^{BP} | 2^1 \Pi_x \rangle & \text{SO}_8 = \langle X^3 \Sigma^- | \hat{H}_{SO}^{BP} | 2^1 \Pi_y \rangle & \text{SO}_9 = -i \langle X^3 \Sigma^- | \hat{H}_{SO}^{BP} | 1^3 \Pi_x \rangle \\
\text{SO}_{10} = \langle X^3 \Sigma^- | \hat{H}_{SO}^{BP} | 1^3 \Pi_y \rangle & \text{SO}_{11} = -i \langle X^3 \Sigma^- | \hat{H}_{SO}^{BP} | 2^3 \Pi_x \rangle & \text{SO}_{12} = \langle X^3 \Sigma^- | \hat{H}_{SO}^{BP} | 2^3 \Pi_y \rangle \\
\text{SO}_{13} = -i \langle X^3 \Sigma^- | \hat{H}_{SO}^{BP} | 1^5 \Pi_x \rangle & \text{SO}_{14} = \langle X^3 \Sigma^- | \hat{H}_{SO}^{BP} | 1^5 \Pi_y \rangle & \text{SO}_{15} = -i \langle 1^5 \Sigma^- | \hat{H}_{SO}^{BP} | 1^5 \Pi_x \rangle \\
\text{SO}_{16} = \langle 1^5 \Sigma^- | \hat{H}_{SO}^{BP} | 1^5 \Pi_y \rangle & \text{SO}_{17} = -i \langle 1^5 \Sigma^- | \hat{H}_{SO}^{BP} | 1^3 \Pi_x \rangle & \text{SO}_{18} = \langle 1^5 \Sigma^- | \hat{H}_{SO}^{BP} | 1^3 \Pi_y \rangle \\
\text{SO}_{19} = -i \langle 1^3 \Delta | \hat{H}_{SO}^{BP} | 1^3 \Pi_x \rangle & \text{SO}_{20} = \langle 1^3 \Delta | \hat{H}_{SO}^{BP} | 1^3 \Pi_y \rangle & \text{SO}_{21} = -i \langle 1^3 \Sigma^+ | \hat{H}_{SO}^{BP} | 1^3 \Pi_x \rangle \\
\text{SO}_{22} = \langle 1^3 \Sigma^+ | \hat{H}_{SO}^{BP} | 1^3 \Pi_y \rangle & \text{SO}_{23} = -i \langle 1^1 \Sigma^+ | \hat{H}_{SO}^{BP} | 1^3 \Pi_x \rangle & \text{SO}_{24} = \langle 1^1 \Sigma^+ | \hat{H}_{SO}^{BP} | 1^3 \Pi_y \rangle \\
\text{SO}_{25} = -i \langle 1^1 \Sigma^- | \hat{H}_{SO}^{BP} | 1^3 \Pi_x \rangle & \text{SO}_{26} = \langle 1^1 \Sigma^- | \hat{H}_{SO}^{BP} | 1^3 \Pi_y \rangle & \text{SO}_{27} = -i \langle 1^1 \Pi | \hat{H}_{SO}^{BP} | 1^3 \Pi_x \rangle \\
\text{SO}_{28} = \langle 1^1 \Pi | \hat{H}_{SO}^{BP} | 1^3 \Pi_y \rangle & \text{SO}_{29} = -i \langle 1^3 \Pi_x | \hat{H}_{SO}^{BP} | 1^3 \Pi_y \rangle & 
\end{array}$$


---
